# Supplementary material for: Controllable synthesis of rare earth (Gd3+,Tm3+) doped Prussian blue for multimode imaging guided synergistic treatment
Source: Royal Society of Chemistry journal article supplement (doi:10.1039/d0dt02152k), 2020-01-01
Supplement: d0dt02152k1.pdf [file d0dt02152k1.pdf]

## Supporting Information

### **Controllable synthesis of rare earth( $Gd^{3+}$ , $Tm^{3+}$ ) doped Prussian blue for multimode imaging guided synergistic treatment**

Mingyue Xu<sup>a#</sup>, Bin Chi<sup>b#</sup>, Zhiyuan Han<sup>a#</sup>, Yuting He<sup>a#</sup>, Feng Tian<sup>a</sup>, Zushun Xu<sup>a</sup>,

Ling Li<sup>a\*</sup>, Jing Wang<sup>b\*</sup>

a. Hubei Collaborative Innovation Center for Advanced Organic Chemical  
Materials, Ministry-of-Education Key Laboratory for the Synthesis and Application of  
Organic Function Molecules, Hubei University 430062, People's Republic of China

b. Department of Radiology, Union Hospital, Tongji Medical College, Huazhong  
University of Science and Technology, Wuhan 430022, China

## Content

|                                                        |     |
|--------------------------------------------------------|-----|
| Figure S1 UV-vis-NIR spectra of Gd / Tm PB             | S-1 |
| Figure S2 SEM of PBA@MOF@PDA                           | S-1 |
| Figure S3 EDX spectrum of Gd / Tm-PBA@ZIF-8@PDA        | S-2 |
| Figure S4 XRD patterns and FT-IR spectra               | S-2 |
| Figure S5 N <sub>2</sub> sorption–desorption isotherms | S-3 |
| Figure S6 Cell imaging of Gd / Tm-PBA@ZIF-8@PDA        | S-4 |
| Figure S7 NIR-triggered release of DOX                 | S-4 |

Figure S8 The cytotoxicity of Gd/Tm-PB@ZIF-8/PDA-DOX and free DOX

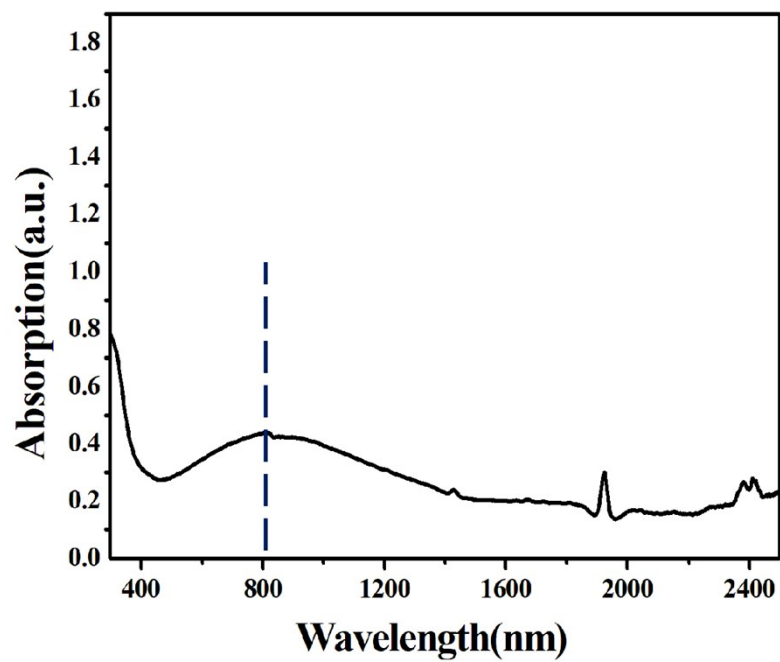

Fig S1. UV-vis-NIR spectra of Gd / Tm PB (Tm25%) aqueous solutions.

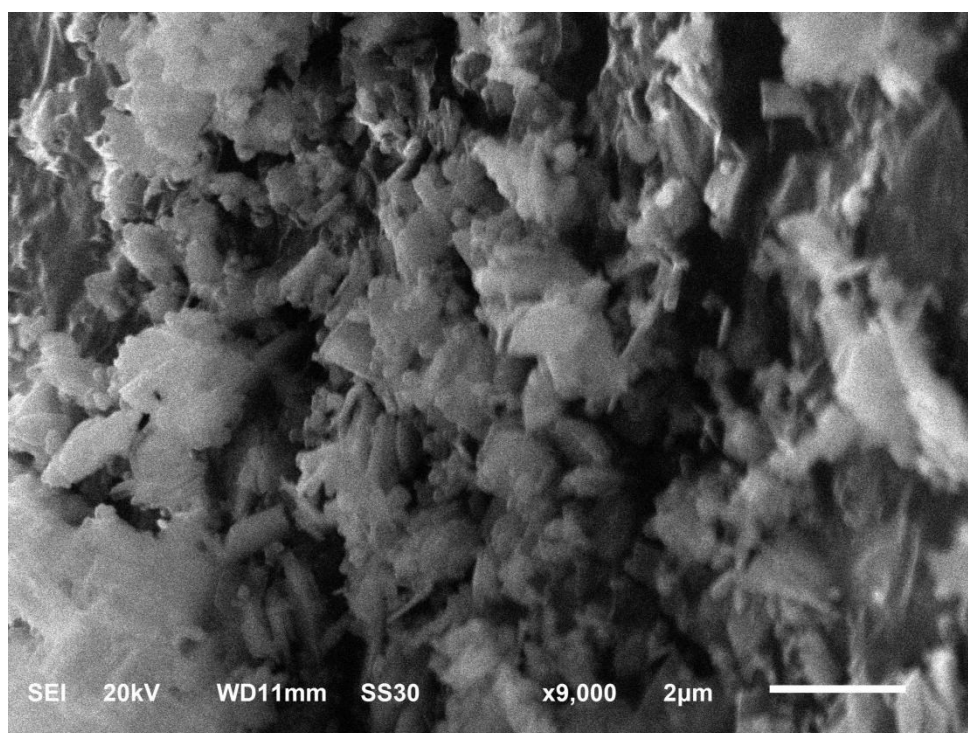

Figure S2. SEM of Gd/Tm-PB@ZIF-8/PDA

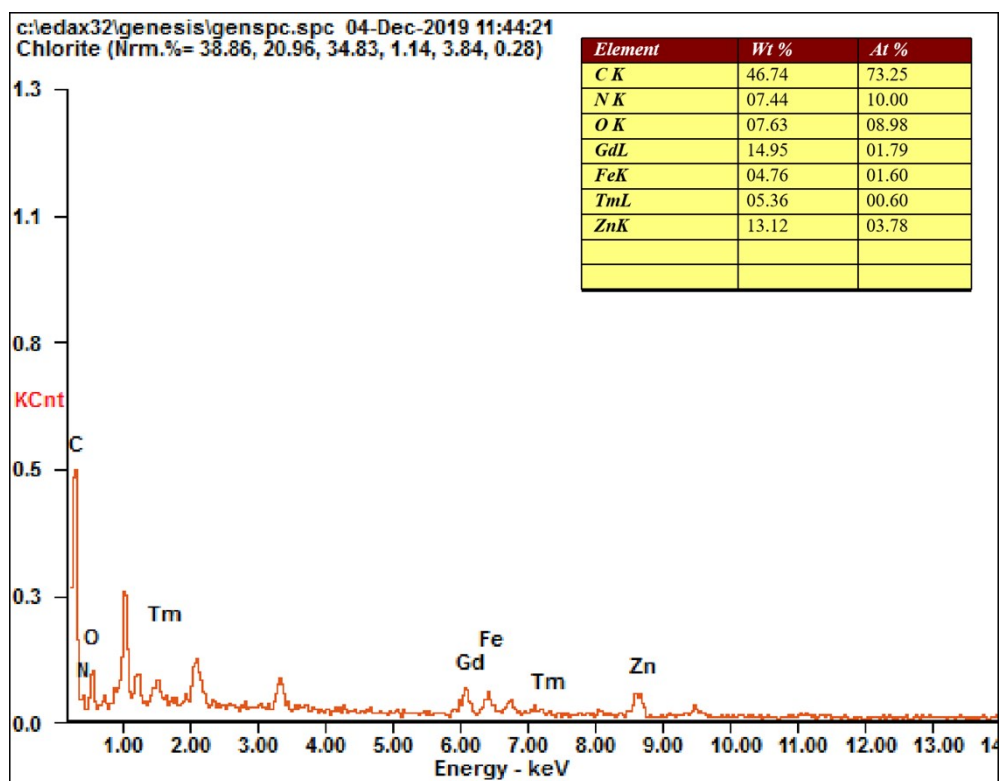

Figure S3 EDX spectrum of Gd/Tm-PB@ZIF-8/PDA

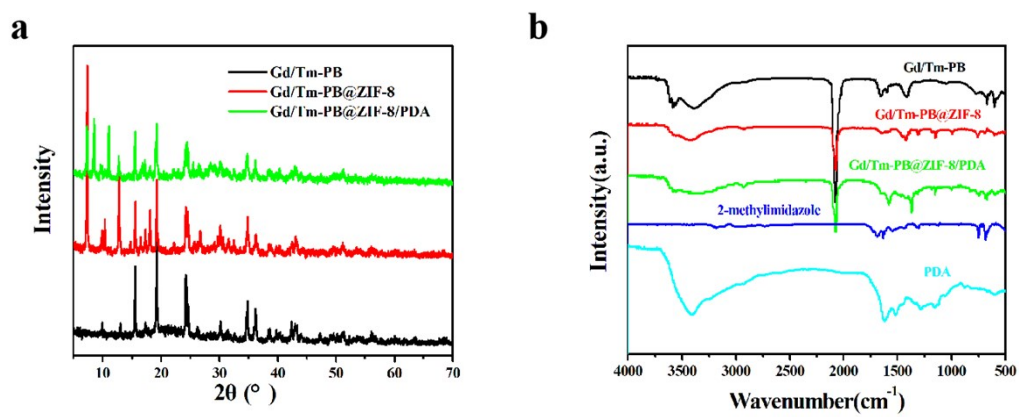

Figure S4 XRD patterns (a) and FT-IR spectra (b).

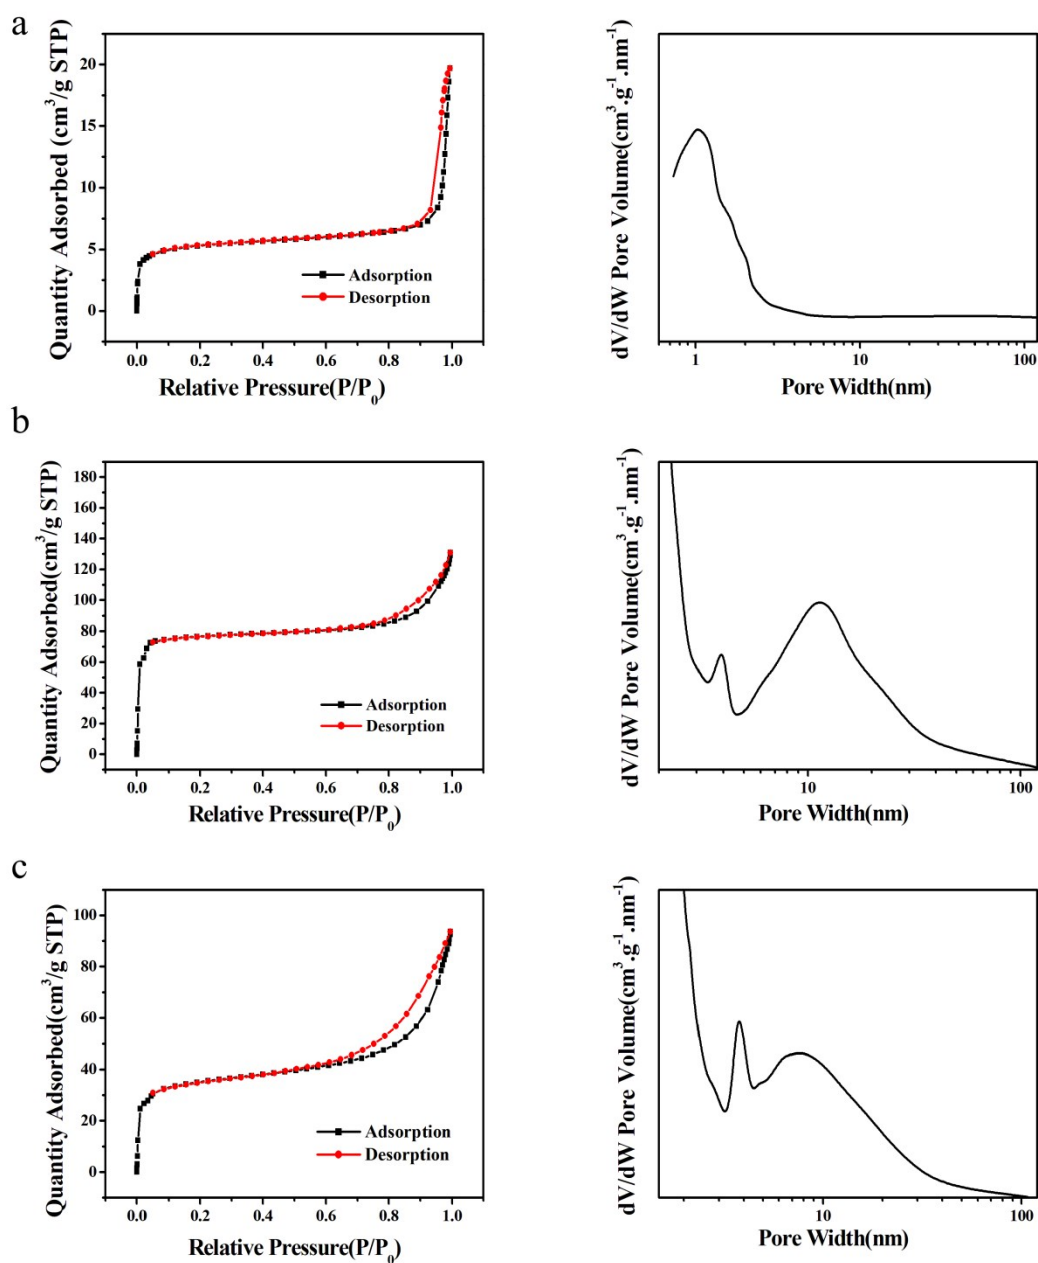

Figure S5  $N_2$  sorption-desorption isotherms of the as-prepared Gd/Tm-PB (a), Gd/Tm-PB@ZIF-8 (b) and Gd/Tm-PB@ZIF-8/PDA (c) Nanoparticles measured at 77 K.

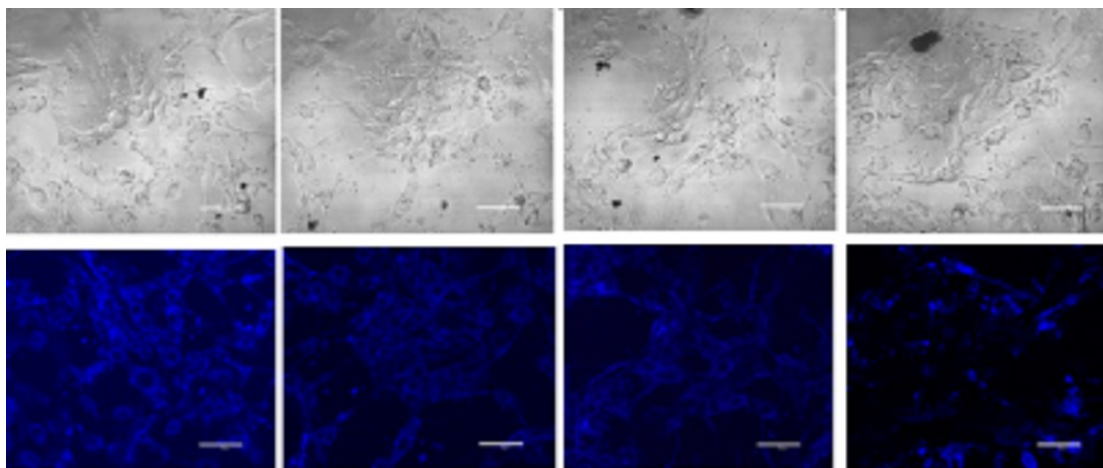

Figure S6 Confocal laser scanning microscope (CLSM) of Gd/Tm-PB@ZIF-8/PDA.

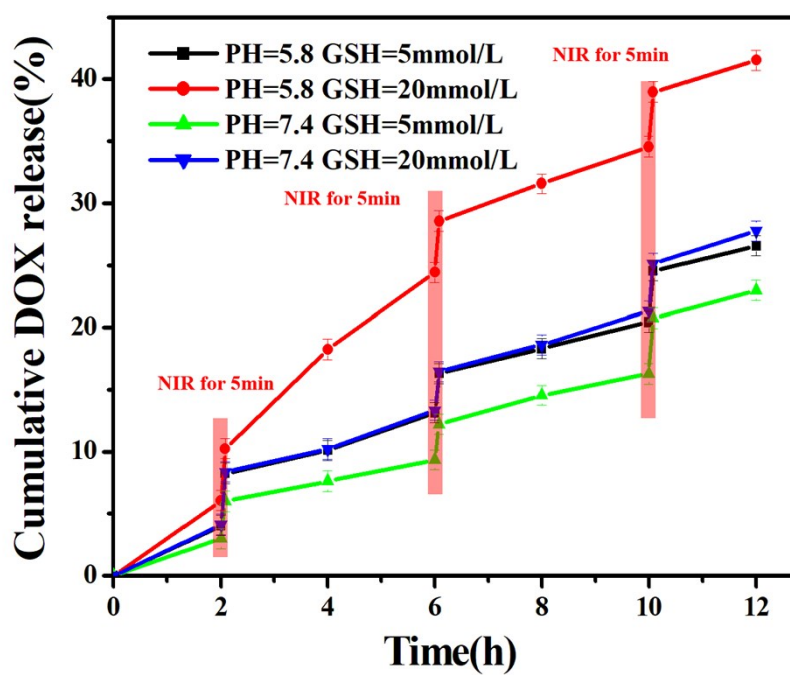

Figure S7. NIR-triggered release of DOX. The samples were irradiated with an NIR laser ( $1.5 \text{ W cm}^{-2}$ ) for 5 min at different time points as indicated by the arrows.

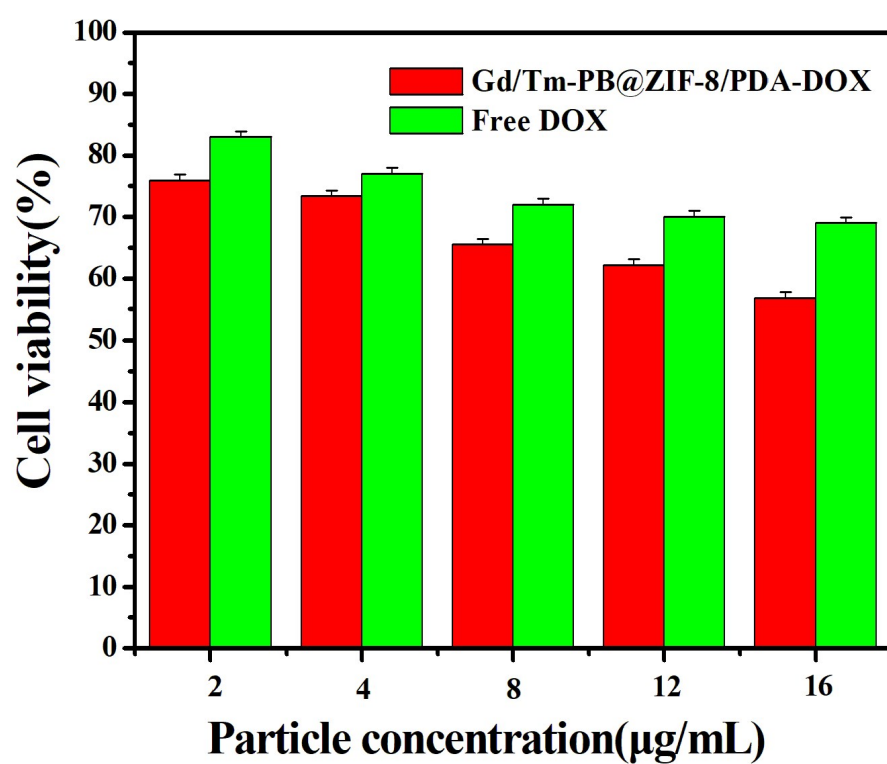

Figure S8 The cytotoxicity of DOX loaded Gd/Tm-PB@ZIF-8/PDA and free DOX in Hela cells .
